# Supplementary material for: A biphasic astrocytic PTGDS trajectory marks a metabolic vulnerability stage in prodromal Alzheimer’s disease
Source: Research Square preprint supplement (doi:10.21203/rs.3.rs-9499795/v2), 2026-06-10
Supplement: Supplementary file 1 [file 2bb782be86f2c8290edf6fbb.xlsx]

## Sheet: Description
Supplementary Table S9. Independent brain bulk proteomic validation of PTGDS and the M25 metabolism module.
Source dataset:	Johnson ECB, Carter EK, Dammer EB et al. (2022) Nat Neurosci 25:213–225.
Cohorts:	ROSMAP DLPFC (n = 84 control, 148 AsymAD, 108 AD) + Banner Sun Health Research Institute DLPFC (n = 26 control, 58 AsymAD, 92 AD); 488 tissues; 8,619 proteins by TMT-MS.
Source tables:	Individual-protein statistics extracted from Supplementary Table 2 (sheet '2.Master.PD.cleanDat.Stat.kME'); module-level eigenprotein statistics extracted from Supplementary Table 17 (sheet '17.ANOVA.SynthEigenprotein').
Statistical methods (as reported in source):	ANOVA across diagnostic groups; Tukey HSD for pairwise comparison; Holm correction across 8,619 proteins for individual-protein analyses.

## Sheet: S9A_Protein_level
Panel A. Individual-protein differential abundance (ROSMAP + Banner DLPFC, n = 488)
Protein	log2(AD) − log2(Control)	log2(AsymAD) − log2(Control)	log2(AD) − log2(AsymAD)	ANOVA F	ANOVA P	Holm P (AD vs Ctrl)
PTGDS	0.0904	0.0395	0.0509	5.752	3.40 × 10⁻³	2.64 × 10⁻³
LCN2	0.093	0.0201	0.0729	1.479	0.230	0.290
WGCNA module assignment:	PTGDS → M25 Sugar Metabolism (kME = 0.4244); LCN2 → M41 Ambiguous (kME = 0.7187)
Note:	PTGDS shows significant elevation in AD with Holm-corrected p = 2.6 × 10⁻³ (across all 8,619 proteins). LCN2 shows directionally concordant elevation but does not reach significance, consistent with high case-to-case variance expected for an inducible NF-κB-regulated transcript and with secreted-protein detection limits in bulk-tissue MS.

## Sheet: S9B_Module_level
Panel B. M25 Sugar Metabolism module synthetic eigenprotein across cohorts and brain regions
Cohort / Brain region	ANOVA F	ANOVA P	Tukey P (AD vs Ctrl)	Avg diff log2(AD) − log2(Ctrl)	Notes
Mt. Sinai BA-36 (parahippocampal gyrus, temporal lobe)	1.957	0.145	0.192	0.0258	Trend toward upregulation, NS
ROSMAP BA-6 (frontal cortex)	2.667	0.074	0.067	0.0111	Marginal trend
ROSMAP BA-37 (inferior temporal cortex)	5.612	4.80 × 10⁻³	3.18 × 10⁻³	0.0166	Significant; anatomically matches SEA-AD MTG
Emory BA-9 (DLPFC, AD vs Ctrl in PD-included design)	1.854	0.171	0.272	0.0951	NS, smaller cohort
Emory BA-24 (anterior cingulate gyrus)	5.759	6.65 × 10⁻³	7.79 × 10⁻³	0.1778	Significant
Note:	Significant module-level upregulation (Tukey p < 0.01 for AD vs Control) is observed in two of five tested regions (ROSMAP BA-37 inferior temporal cortex; Emory BA-24 anterior cingulate). Crucially, the strongest signal occurs in the temporal-lobe region anatomically corresponding to the SEA-AD middle temporal gyrus atlas used for the discovery trajectory.

## Sheet: S9C_M25_members
Panel C. Top M25 Sugar Metabolism module members ranked by kME (top 20 of 104)
Symbol	kME	log2(AD) − log2(Control)	Holm P (AD vs Ctrl)	Functional annotation
DYNC1H1	0.724	0.0007	0.922	Cytoplasmic dynein 1 heavy chain
RUFY3	0.687	0.012	0.299	RUN/FYVE domain protein
AHCY	0.683	0.0206	0.041	Adenosylhomocysteinase (SAM cycle)
GRHPR	0.682	0.0708	2.26 × 10⁻¹²	Glyoxylate/hydroxypyruvate reductase
ACTR1A	0.681	0.0086	0.519	Alpha-centractin
DCTN1	0.671	0.004	0.481	Dynactin subunit 1
PGD	0.669	0.0537	4.32 × 10⁻⁹	6-phosphogluconate dehydrogenase (pentose phosphate)
TRIM2	0.662	0.0223	0.020	Tripartite motif protein
NUDT5	0.661	0.0482	1.45 × 10⁻⁴	ADP-sugar pyrophosphatase
GGPS1	0.658	0.025	0.058	Geranylgeranyl pyrophosphate synthase (isoprenoid)
ACSS2	0.655	0.0419	2.26 × 10⁻³	Acetyl-CoA synthetase, cytoplasmic
GARS	0.644	0.016	0.162	Glycyl-tRNA synthetase
UBA6	0.642	0.0192	0.043	Ubiquitin-activating enzyme 6
GDI2	0.636	0.0145	0.336	Rab GDP dissociation inhibitor beta
TXNL1	0.635	0.0257	0.021	Thioredoxin-like protein 1
DYNC1LI2	0.627	0.0251	4.44 × 10⁻³	Cytoplasmic dynein light intermediate chain 2
GLRX3	0.615	0.0319	4.48 × 10⁻³	Glutaredoxin-3
TARS	0.615	0.0277	2.37 × 10⁻³	Threonyl-tRNA synthetase
MAP2K2	0.608	0.0258	5.47 × 10⁻³	MAP kinase kinase 2 (MEK2)
FASN	0.578	0.0523	1.37 × 10⁻⁶	Fatty acid synthase (lipid biosynthesis)
Note:	PTGDS is rank 74 of 104 module members (kME = 0.4244). Module hub proteins include FASN (fatty acid synthesis), GGPS1 (isoprenoid biosynthesis), ACSS2 (acetyl-CoA metabolism), AHCY (SAM-cycle methylation supplying lipid biosynthesis), and PGD (pentose phosphate pathway, NADPH supply for lipogenesis), directly congruent with the lipid-metabolic exhaustion framework proposed in this study.
